# Supplementary material
Source: PubMed Central journal article supplement (PMC8159909)
Supplement: NIHMS1694241-supplement-Supplementary_material.pdf [file NIHMS1694241-supplement-Supplementary_material.pdf]

## Supplementary Information

### Loss of DLX3 tumor suppressive function promotes progression of SCC through EGFR-ERBB2 pathway

Deepti Bajpai, Spencer Mehdizadeh, Akihiko Uchiyama, Yuta Inoue, Andrew Sawaya, Andrew Overmiller, Stephen R. Brooks, Kowser Hasneen, Meghan Kellett, Elisabetta Palazzo, Sei-ichiro Motegi, Stuart H. Yuspa, Christophe Cattaillon and Maria I. Morasso

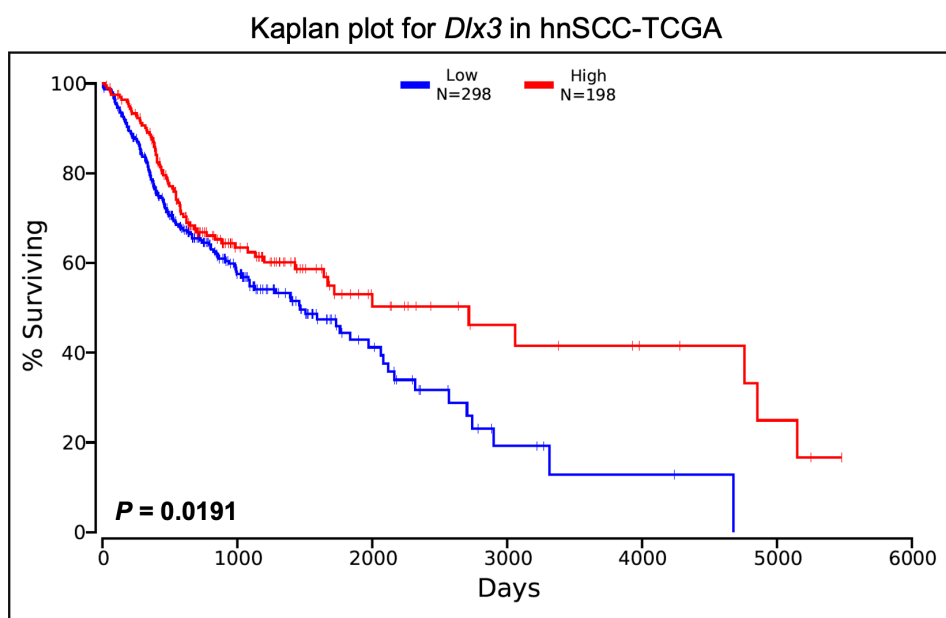

Calculated using OncoLnc

**Supplementary Figure S1.** *Dlx3* mRNA levels correlates with poor prognosis in hnSCC. Kaplan-Meier plot for *Dlx3* in hnSCC patients (No. of patients=497). (Source data: <http://www.oncolnc.org/>). The logrank P-value is indicated on the graph

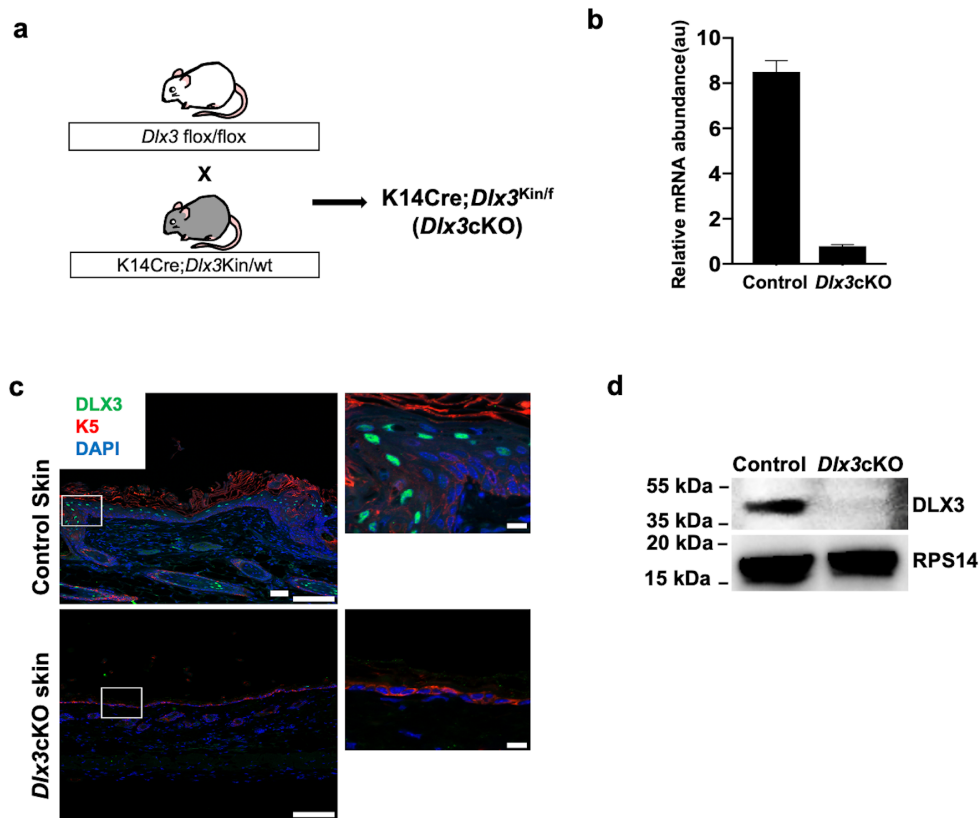

**Supplementary Figure S2. K14Cre-mediated conditional deletion of *Dlx3*.** (a) Schematic representation of mouse genotypes used to create skin keratinocyte-specific induction of *Dlx3* deletion. Homozygous *Dlx3*<sup>f/f</sup> mice were crossed with K14Cre;Kin mouse where one *Dlx3* allele was replaced by LacZ knock-in. (b) Total RNAs were quantified from the epidermis of both control and *Dlx3*cKO mice by real-time RT-PCR analysis, and the knockdown levels of *Dlx3* were determined by the relative Ct method (P-value <0.005). (c) The specificity of Cre mediated deletion was determined by immunohistochemistry on skin sections from wild-type and *Dlx3*cKO littermates. DLX3 (green) expression is shown in the suprabasal cells in the control skin only. Images are DAPI stained to denote nuclear staining. Scale bar: 100µm and 10µm. (d) The specific deletion of DLX3 expression was detected in the *Dlx3*cKO epidermal extracts of P12 skin by Western blot.

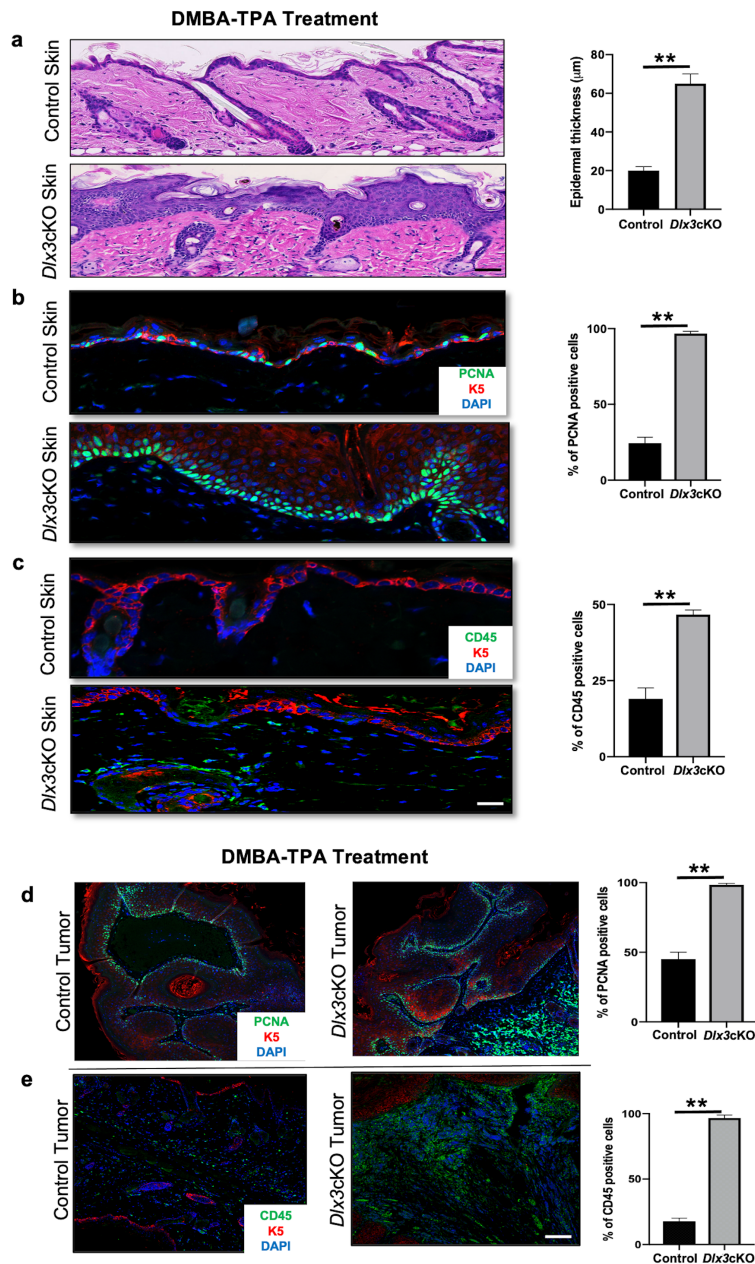

**Supplementary Figure S3. *Dlx3* deficiency enhances DMBA/TPA induced epidermal hyperproliferation and inflammation.** Epidermal thickness; Means of epidermal thickness was calculated based on 10–15 random site measurements. (a) HE-stained skin sections from the backs of the mice. Sections were used for evaluation of epidermal thickness. Columns in (a) are group means  $\pm$ SEM (n=5, n=5 for control skin, *Dlx3cKO* skin respectively). (b) PCNA immunofluorescence staining reveals higher cell proliferation in *Dlx3cKO* skin. Skin sections were stained with antibodies to detect PCNA expression and quantitated. (c) Confocal images of skins

sections indicated mice stained for expression of CD45, cytokeratin 5 and counter stained with DAPI. (d) Immunofluorescence analysis of PCNA in a representative control mouse-derived papilloma (left panel) and *Dlx3*cKO mouse-derived papilloma (right panel). The numbers of PCNA positive epidermal cells were counted from at least 100 cells in five separate fields for each section respectively (n = 3). \*\*P-value < 0.01. (e) Images of control mouse-derived papilloma (left panel) and *Dlx3*cKO mouse-derived papilloma (right panel) stained with antibodies for CD45. Scale bars = 100µm



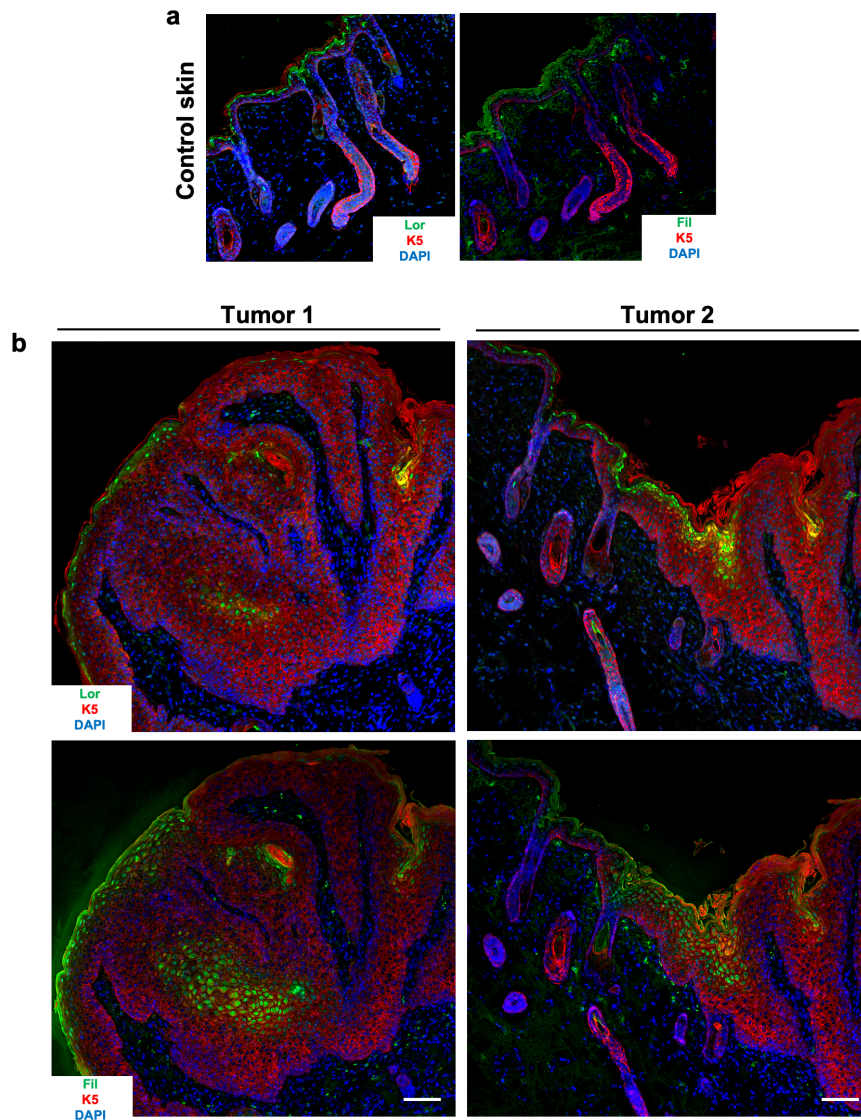

**Supplementary Figure S4.** Representative images of control skin, and papilloma from *Dlx3cKO* mice. Dual immunofluorescence staining was performed for K5 (red), Loricrin (green) and Filaggrin (green). The nuclei were counterstained with DAPI (blue). Scale bars: 100µm.

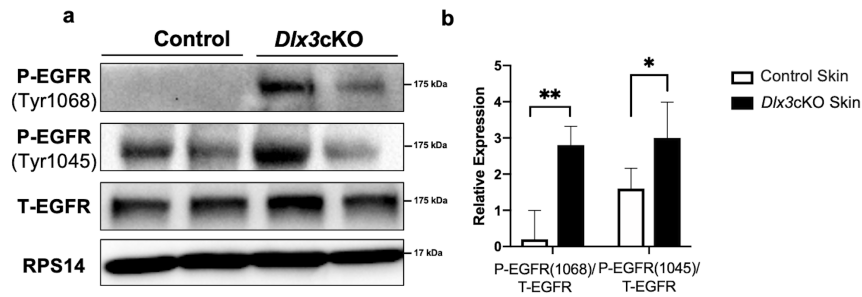

**Supplementary Figure S5. Intracellular domain of EGFR correspond to different signal pathways and functions.** The levels of total EGFR, pEGFR (Y1068), pEGFR (Y1045), and RPS14 were assessed by immunoblot analysis (a) and quantitated by ImageJ (b). Data were normalized to total EGFR, expressed as the fold change (mean  $\pm$  SEM; n = 4) and analyzed by paired t test. \*P < 0.05; \*\*P < 0.01 (versus Control).

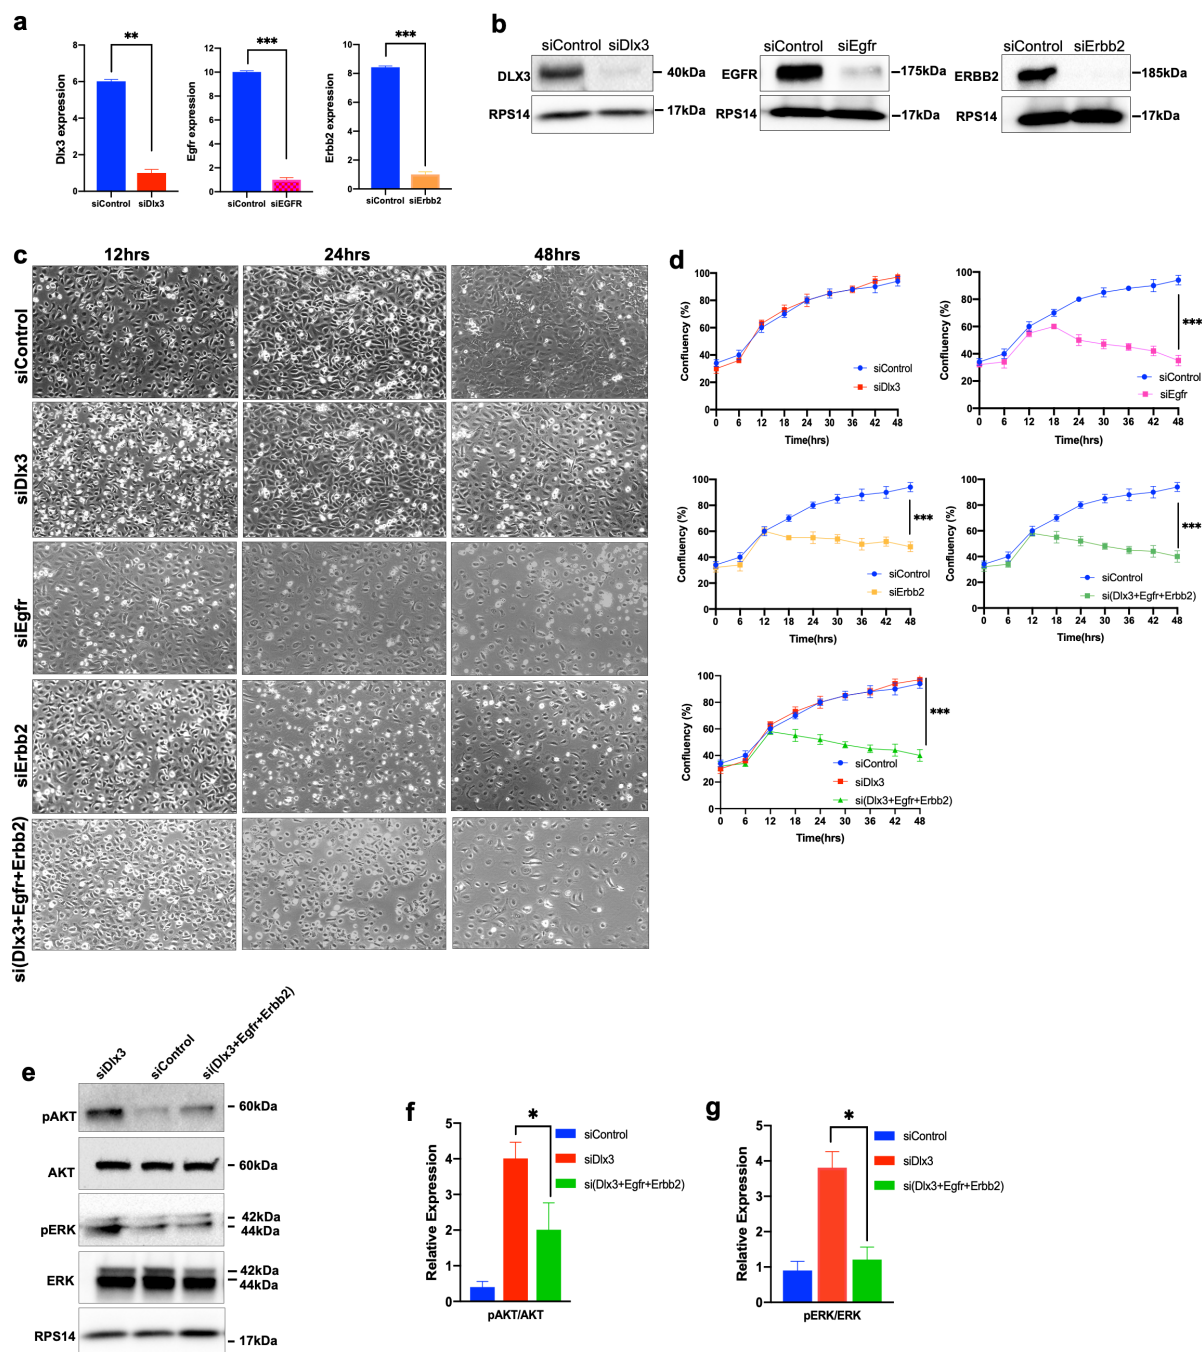

**Supplementary Figure S6. Suppressing downstream mediators of DLX3 function in skin keratinocytes inhibits proliferation in vitro.** (a) mRNA expression of Dlx3, Egfr and Erbb2 in mouse primary keratinocytes treated with si-target gene and si-Control for 48 hours. (b) Immunoblot images showing knockdown of DLX3, EGFR, and ERBB2 expression in mouse primary keratinocytes treated by si-target gene and si-Control for 48 hours. (c) Phase contrast

images show in primary keratinocytes at hours 12, 24, and 48 after siRNA transfection. The cells were treated with siControl, siDlx3, siEgfr, siErbB2, and combination of all the three siRNAs **(d)** Proliferation assays with primary mouse keratinocytes were quantified every 6 hours for 48 hours, n = 3 per group. Cell proliferation was monitored by analyzing the occupied area (% confluence) of cell images over time. Data expressed as mean  $\pm$  standard error of the mean. \*\*\*P<0.005 **(e)** Immunoblot images showing loss of AKT and ERK1/2 expression in Dlx3 knockdown keratinocytes transfected with si-Egfr and si-ErbB2 for 48 hours. RPS14 was used as a loading control. **(f)** Quantification of pAKT and **(g)** pERK1/2 protein (n=3). Data expressed as mean  $\pm$  standard error of the mean \*P<0.05.

**Supplementary Table 1: List of antibodies used for immunofluorescence studies**

| Primary antibodies                                    | supplier                  | species    | type       | dilutions | reference     |
|-------------------------------------------------------|---------------------------|------------|------------|-----------|---------------|
| DLX-3                                                 | Abcam                     | Rabbit     | Monoclonal | 1:500     | ab178428      |
| KRT-13                                                | Abcam                     | Rabbit     | Monoclonal | 1:400     | ab92551       |
| KRT-10                                                | BioLegend                 | Rabbit     | Polyclonal | 1:500     | PRB-159P      |
| KRT-5                                                 | LSBio                     | Guinea pig | Polyclonal | 1:500     | LS-C22715-100 |
| PCNA                                                  | Cell Signaling Technology | Rabbit     | Monoclonal | 1:100     | 13110         |
| Loricrin                                              | BioLegend                 | Rabbit     | Polyclonal | 1:1000    | PRB-145P      |
| Filaggrin                                             | BioLegend                 | Rabbit     | Polyclonal | 1:500     | PRB-417P      |
| <b>Secondary Antibodies (ThermoFisher Scientific)</b> |                           |            |            |           |               |
|                                                       |                           | species    | type       | dilutions | reference     |
| Alexa Flour 488                                       |                           | Goat       | Polyclonal | 1:250     | A-11008       |
| Alexa Fluor 546                                       |                           | Goat       | Polyclonal | 1:250     | A-11010       |

**Supplementary Table 2: List of antibodies used in western blotting**

| <b>Antibody name</b>         | <b>Company</b>        | <b>Dilution</b> |
|------------------------------|-----------------------|-----------------|
| <b>DLX3</b>                  | Morasso lab; [10]     | 1:1000          |
| <b>EGFR</b>                  | Cell Signaling (2232) | 1:2000          |
| <b>phospho-EGFR, Tyr845</b>  | Cell Signaling (2231) | 1:1000          |
| <b>phospho-EGFR, Tyr1045</b> | Cell Signaling (2237) | 1:1000          |
| <b>phospho-EGFR, Tyr1068</b> | Cell Signaling (3777) | 1:1000          |
| <b>phospho-EGFR, Tyr1173</b> | Cell Signaling (2244) | 1:1000          |
| <b>ERK</b>                   | Cell Signaling (9102) | 1:2000          |
| <b>phospho-ERK</b>           | Cell Signaling (4370) | 1:1000          |
| <b>ERBB2</b>                 | Cell Signaling (2165) | 1:2000          |
| <b>phospho-ERBB2</b>         | Cell Signaling (2241) | 1:1000          |
| <b>AKT</b>                   | Cell Signaling (4691) | 1:2000          |
| <b>phospho-AKT</b>           | Cell Signaling (4060) | 1:1000          |
| <b>RPS14</b>                 | Bethyl A304-031       | 1:1000          |
